# Supplementary material for: Genesis of a Fungal Non-Self Recognition Repertoire
Source: PLOS journal article supplement (doi:10.1371/journal.pone.0000283), 2007-03-13
Supplement: S6 (10.1371/journal.pone.0000283.s006) [file journal.pone.0000283.s006]

**Table S2:** GC content of the NWD family

GC content of the *NWD* loci were determined for each member of the gene family. Control values (CTL) were defined as the GC and TA contents averaged over twenty randomly chosen 750bp control sequences. Shaded values are significantly lower than the rest of the dataset at a 95% confidence interval.

|               | % GC  | %AT   |
|---------------|-------|-------|
| <i>het-D</i>  | 50.64 | 49.36 |
| <i>het-E</i>  | 49.16 | 50.84 |
| <i>HNWD1</i>  | 48.72 | 51.28 |
| <i>HNWD2</i>  | 50.57 | 49.43 |
| <i>HNWD3</i>  | 49.41 | 50.59 |
| <i>NWD1</i>   | 55.55 | 44.45 |
| <i>NWD2</i>   | 51.42 | 48.58 |
| <i>NWDp-1</i> | 43.85 | 56.15 |
| <i>NWDp-2</i> | 37.32 | 62.68 |
| <i>NWDp-3</i> | 51.36 | 48.64 |
| <i>CTL</i>    | 50.23 | 49.77 |
